# Supplementary material for: In Vivo Bioconcentration, Distribution and Metabolization of Benzophenone-3 (BP-3) by Cyprinus carpio (European Carp)
Source: MDPI journal article supplement (doi:10.3390/foods11111627), 2022-05-31
Supplement: s1 [file s1]

**In vivo bioconcentration, distribution and metabolization of benzophenone-3 (BP-3) by *Cyprinus carpio* (European carp)**

Florentina Laura Chiriac, Irina Eugenia Lucaciu, Iuliana Paun, Florinela Pirvu,  
Stefania Gheorghe\*

**Table S1.** Experimental condition used for identification of BP-3 and metabolites in fish tesue and organs

| Compou<br>nd | Chemical<br>structure                                                               | tr       | MRM     | Fragment<br>or Voltage<br>(V) | Collizion<br>Energy<br>(V) | Cell<br>Accelerated<br>Voltage (V) | Dwell<br>time<br>(msec) | ESI     |
|--------------|-------------------------------------------------------------------------------------|----------|---------|-------------------------------|----------------------------|------------------------------------|-------------------------|---------|
| 4HBP         | 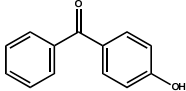   | 3.6<br>1 | 197-92  | 150                           | 40                         | 5                                  | 165                     | Negativ |
| BP-1         |    | 4.5<br>1 | 213-135 | 130                           | 20                         | 4                                  | 250                     | Negativ |
| 2,3,4HBP     |   | 3.1<br>6 | 229-151 | 135                           | 25                         | 0                                  | 165                     | Negativ |
| BP-2         |  | 2.5<br>6 | 245-91  | 110                           | 30                         | 5                                  | 165                     | Negativ |
| BP-3         |  | 8.0<br>9 | 229-151 | 135                           | 20                         | 1                                  | 250                     | Pozitiv |
| BP-8         |  | 5.0<br>8 | 245-121 | 150                           | 20                         | 5                                  | 250                     | Pozitiv |
| BP-10        |  | 8.9<br>6 | 243-151 | 130                           | 20                         | 2                                  | 250                     | Pozitiv |

**Table S2.** Acquisition segments set for BP-3 and metabolite detection.

| Time<br>segment | Start<br>Time<br>(min) | Scan Type | Ionization<br>mode | Div Valve | Store |
|-----------------|------------------------|-----------|--------------------|-----------|-------|
| 1               | 0                      | MRM       | ESI                | To Waste  | No    |
| 2               | 2.4                    | MRM       | ESI                | To MS     | Yes   |
| 3               | 4.3                    | MRM       | ESI                | To MS     | Yes   |
| 4               | 5.5                    | MRM       | ESI                | To MS     | Yes   |
| 5               | 7.2                    | MRM       | ESI                | To MS     | Yes   |
| 6               | 8.8                    | MRM       | ESI                | To MS     | Yes   |
| 7               | 10                     | MRM       | ESI                | To Waste  | No    |

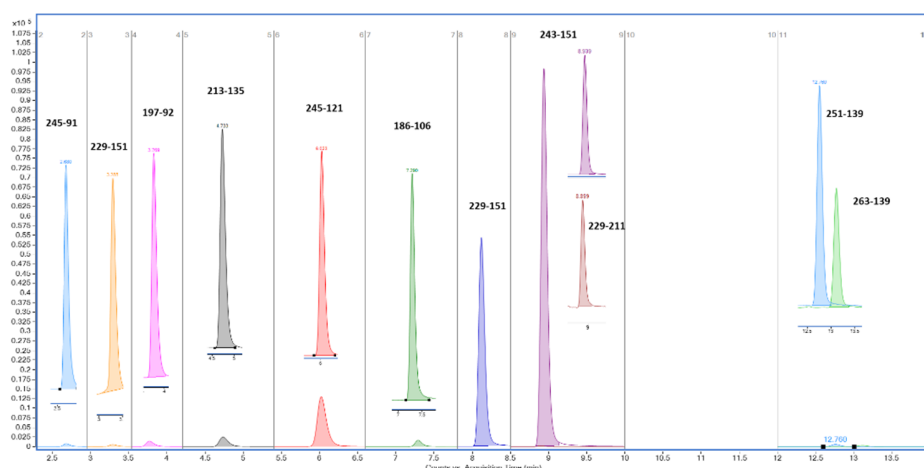

**Figure S1** MRM chromatogram obtained for UV-Filters and IS (50ng/mL)

**Table S3.** Recoveries (R) and limits of quantification (LOQ) obtained for water and fish tissue

| Analytes | R <sup>a</sup> | LOQ <sup>b</sup> | R <sup>c</sup> | LOQ <sup>d</sup> |
|----------|----------------|------------------|----------------|------------------|
| BP-2     | 82.7           | 1.15             | 77.2           | 0.48             |
| 234HBP   | 81.4           | 0.92             | 75.4           | 0.12             |
| 4HBP     | 90.0           | 0.18             | 88.1           | 0.56             |
| BP-1     | 101.2          | 0.81             | 115            | 0.33             |
| BP-8     | 89.5           | 0.20             | 82.6           | 0.68             |
| BP-3     | 108.7          | 1.22             | 112            | 0.26             |
| BP-10    | 90.2           | 0.41             | 74             | 0.78             |

<sup>a</sup> Recoveries obtained for water (%); <sup>b</sup> LOQ determined for water ng/L; <sup>c</sup> Recoveries obtained for fish tissue (%); <sup>d</sup> LOQ determined for fish tissue in ng/g d.w.

**Table S4.** Matrix effect values determined for BP-3 and metabolites in the biological matrix

| Analytes | Matrix effect, % |
|----------|------------------|
| BP-2     | 42               |
| 234-HBP  | 70               |
| 4-HBP    | 1856             |
| BP-1     | 1791             |
| BP-8     | 78               |
| BP-3     | 3464             |
| BP-10    | 29               |

**Table S5.** Initial characteristics of the specimens selected for the bioconcentration test

|                                                  | Test                   | Martor             |
|--------------------------------------------------|------------------------|--------------------|
| Average weight                                   | 25.47 ± 11.08 g / fish | 24.3 ± 6.28 g/fish |
| Total batch weight                               | 501 g                  | 486 g              |
| Average length without caudal peduncle           | 9.16±1.2 cm            | 9.065±0.77 cm      |
| Average total length (including caudal peduncle) | 12.078 ±1.41 cm        | 11.93 ±0.92 cm     |
| Average body height                              | 3.34±0.57cm            | 3.44±0.35 cm       |

**Table S6.** Final characteristics of the specimens selected for the bioconcentration test

|                                                  | Test                  | Martor              |
|--------------------------------------------------|-----------------------|---------------------|
| Average weight                                   | 27.66 ± 8.17 g / fish | 24.76 ± 6.44 g/fish |
| Total batch weight                               | 534 g                 | 493 g               |
| Average length without caudal peduncle           | 9.5 ± 1.09 cm         | 9.4 ± 0.70 cm       |
| Average total length (including caudal peduncle) | 12.03 ± 1.34 cm       | 12 ± 0.88 cm        |
| Average body height                              | 3.35 ± 0.52 cm        | 3.37 ± 0.43 cm      |

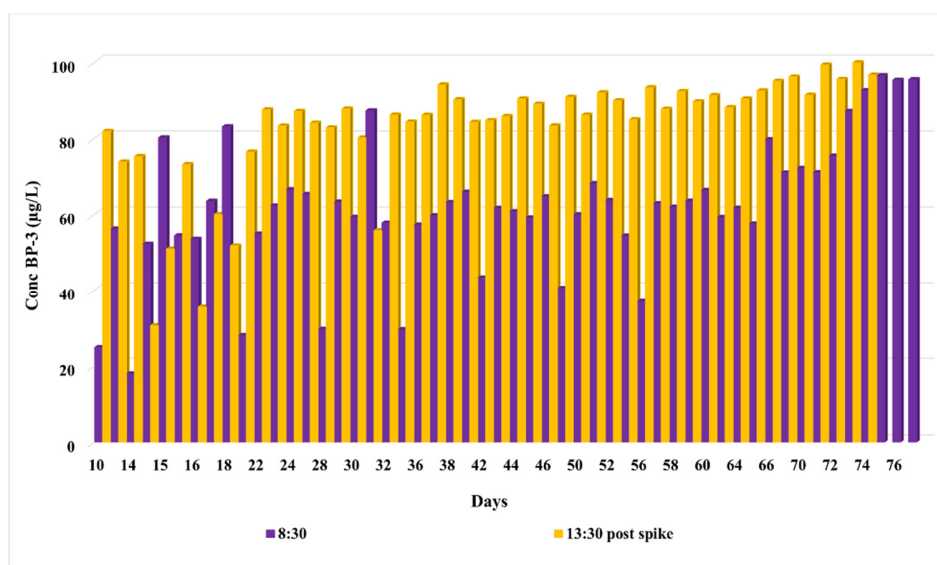**Figure S2.** BP-3 variation in water aquarium during the bioaccumulation experiment



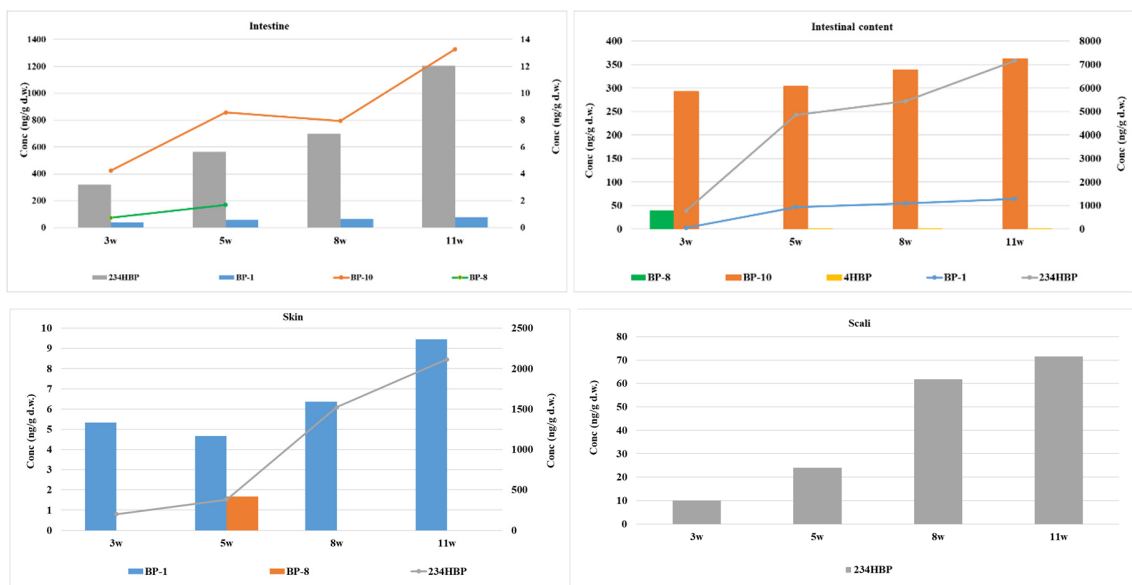

**Figure S4.** Occurrence of BP-3 biotransformation products in fish organs and tissue.

**Table S7.** Concentration values of BP-3 and major biotransformation products (ng/g d.w.) identified in organs and tissue.

| Tissue              | Amalytes | 3w        | 5w        | 8w        | 11w       |
|---------------------|----------|-----------|-----------|-----------|-----------|
| Brain               | 234HBP   | 1207±42.2 | 1031±36.1 | 1815±63.5 | 1762±61.7 |
|                     | BP-1     | 9.01±0.32 | 44.7±1.56 | 13.4±0.47 | 16.7±0.58 |
|                     | BP-3     | 7.32±0.26 | 138±4.83  | 225±7.88  | 229±8.02  |
| Gonads              | 234HBP   | 369±12.9  | 509±17.8  | 647±22.6  | 955±33.4  |
|                     | 4HBP     | ND        | 0.79±0.03 | ND        | ND        |
|                     | BP-1     | 16.8±0.59 | 19.0±0.67 | 25.8±0.90 | 24.8±0.87 |
|                     | BP-8     | ND        | 0.83±0.03 | ND        | ND        |
|                     | BP-3     | 3.18±0.11 | 226±7.91  | 364±12.7  | 468±16.4  |
| Intestine           | 234HBP   | 321±11.2  | 563±19.7  | 698±24.4  | 1206±42.2 |
|                     | BP-1     | 38±1.33   | 57.6±2.02 | 65.5±2.29 | 75.3±2.64 |
|                     | BP-8     | 0.74±0.03 | 1.69±0.06 | ND        | ND        |
|                     | BP-3     | 41.9±1.47 | 77.8±2.72 | 80.2±2.81 | 96.5±3.38 |
|                     | BP-10    | 4.25±0.15 | 8.58±0.30 | 7.95±.28  | 13.3±0.47 |
| Intestinal contents | 234HBP   | 785±27.5  | 4859±170  | 5442±191  | 7172±251  |
|                     | 4HBP     | ND        | 0.72±0.03 | 0.7±0.02  | 0.57±0.02 |
|                     | BP-1     | 48±1.68   | 931±32.6  | 1097±28.4 | 1281±44.8 |
|                     | BP-8     | 40±1.40   | ND        | ND        | ND        |
|                     | BP-3     | 71.8±2.51 | 583±20.4  | 717±25.1  | 782±27.4  |
|                     | BP-10    | 292±10.2  | 304±10.6  | 339±11.9  | 363±12.7  |
| Kidney              | 234HBP   | 297±10.4  | 296±10.4  | 1126±39.4 | 1193±41.8 |
|                     | BP-1     | 53.8±1.88 | 51.8±1.81 | 102±3.57  | 142±4.97  |
|                     | BP-3     | 63.5±2.22 | 55.3±1.94 | 83.7±2.93 | 114±3.99  |

|        |        |           |           |           |           |
|--------|--------|-----------|-----------|-----------|-----------|
| Muscle | 234HBP | 182±6.37  | 327±11.4  | 333±11.7  | 369±12.9  |
|        | BP-1   | 3.67±0.13 | 6.74±0.24 | 7.64±0.27 | 9.83±0.34 |
|        | BP-3   | 19.1±0.67 | 96.3±3.37 | 116±4.06  | 128±4.48  |
| Liver  | 234HBP | 262±9.17  | 517±17.1  | 157±5.50  | 75.7±2.65 |
|        | BP-1   | 40.9±1.43 | 54±1.89   | 20.2±0.71 | 1.08±0.04 |
|        | BP-8   | ND        | 0.67±0.02 | ND        | ND        |
|        | BP-3   | 50.4±1.76 | 186±6.51  | 40.9±1.43 | 5.72±0.20 |
| Gills  | 234HBP | 93.7±3.28 | 313±11.0  | 258±9.03  | 22.7±0.79 |
|        | BP-1   | ND        | ND        | 7.90±0.28 | 2.20±0.08 |
|        | BP-8   | ND        | ND        | 0.93±0.03 | ND        |
|        | BP-3   | 21.1±0.74 | 177±6.20  | 21.6±0.76 | 15.0±0.53 |
|        | BP-10  | ND        | ND        | 25.5±0.89 | ND        |
| Skin   | 234HBP | 199±6.97  | 379±13.3  | 1523±53.3 | 2113±74.0 |
|        | BP-1   | 5.33±0.19 | 4.67±0.16 | 6.37±0.22 | 9.45±0.33 |
|        | BP-8   | ND        | 1.67±0.06 | ND        | ND        |
|        | BP-3   | 47.3±1.66 | 327±11.4  | 414±14.5  | 453±15.9  |
| Scaly  | 234HBP | 10.0±0.35 | 24.0±0.84 | 61.8±2.16 | 71.5±2.50 |
|        | BP-3   | 37.7±1.32 | 55.3±1.94 | 117±4.10  | 156±5.46  |

results expressed as averages of 3 replicates ± SD

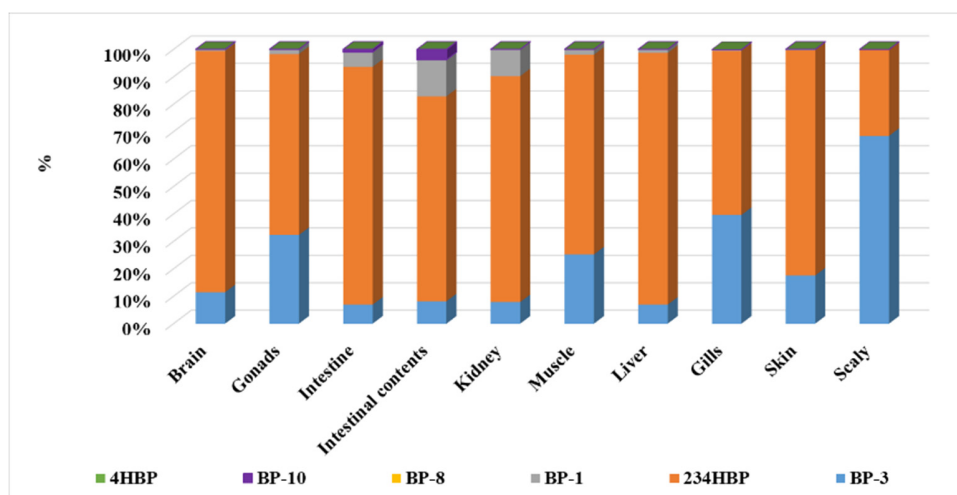

**Figure S5.** Percentage distribution of BP-3 UV filter and its metabolites in fish organs

**Table S8.** Concentration values of BP-3 and major biotransformation products ( $\mu\text{g/L}$ ) identified in water

| Analytes | 3w              | 5w              | 8w              | 11w             |
|----------|-----------------|-----------------|-----------------|-----------------|
| 234HBP   | 2177 $\pm$ 32.2 | 2757 $\pm$ 40.8 | 3328 $\pm$ 49.3 | 4050 $\pm$ 59.5 |
| 4HBP     | ND              | ND              | ND              | ND              |
| BP-1     | 25 $\pm$ 0.37   | 112 $\pm$ 1.66  | 125 $\pm$ 1.85  | 152 $\pm$ 2.25  |
| BP-3     | 371 $\pm$ 5.48  | 41 $\pm$ 0.61   | 58.3 $\pm$ 0.86 | 92.4 $\pm$ 1.37 |

results expressed as averages of 3 replicates  $\pm$  SD

**Table S9.** Pearson correlation and p-values determined between BP-3 and metabolites in gills

| Gills  |               | BP-1   | BP-8  | BP-3  | BP-10 |
|--------|---------------|--------|-------|-------|-------|
| 234HBP | Pearson Corr. | -0.211 | 0.258 | 1.000 | 0.258 |
|        | p value       | 0.789  | 0.742 | 0.000 | 0.742 |
| BP-1   | Pearson Corr. |        | 0.816 | 0.789 | 0.816 |
|        | p value       |        | 0.018 | 0.022 | 0.184 |
| BP-8   | Pearson Corr. |        |       | 0.258 | 1.000 |
|        | p value       |        |       | 0.742 | 0.001 |
| BP-3   | Pearson Corr. |        |       |       | 0.724 |
|        | p value       |        |       |       | 0.016 |

**Table S10.** Pearson correlation and p-values determined between BP-3 and metabolites in liver

| Liver  |               | BP-1  | BP-8  | BP-3  |
|--------|---------------|-------|-------|-------|
| 234HBP | Pearson Corr. | 1.000 | 0.775 | 1.000 |
|        | p value       | 0.000 | 0.225 | 0.000 |
| BP-1   | Pearson Corr. |       | 0.775 | 1.000 |
|        | p value       |       | 0.225 | 0.000 |
| BP-8   | Pearson Corr. |       |       | 0.775 |
|        | p value       |       |       | 0.025 |

**Table S11.** Pearson correlation and p-values determined between BP-3 and metabolites in muscle

| Muscle |               | BP-1  | BP-3  |
|--------|---------------|-------|-------|
| 234HBP | Pearson Corr. | 1.000 | 1.000 |
|        | p value       | 0.000 | 0.000 |
| BP-1   | Pearson Corr. |       | 1.000 |
|        | p value       |       | 0.000 |

**Table S12.** Pearson correlation and p-values determined between BP-3 and metabolites in kidney

| Kidney |               | BP-1  | BP-3  |
|--------|---------------|-------|-------|
| 234HBP | Pearson Corr. | 1.000 | 1.000 |
|        | p value       | 0.000 | 0.000 |
| BP-1   | Pearson Corr. |       | 1.000 |
|        | p value       |       | 0.000 |

**Table S13.** Pearson correlation and p-values determined between BP-3 and metabolites in brain

| Brain  |               | BP-1   | BP-3  |
|--------|---------------|--------|-------|
| 234HBP | Pearson Corr. | -0.400 | 0.760 |
|        | p value       | 0.184  | 0.040 |
| BP-1   | Pearson Corr. |        | 0.400 |
|        | p value       |        | 0.184 |

**Table S14.** Pearson correlation and p-values determined between BP-3 and metabolites in gonads

| Gonads |               | 4HBP   | BP-1   | BP-8   | BP-3   |
|--------|---------------|--------|--------|--------|--------|
| 234HBP | Pearson Corr. | -0.258 | 0.800  | -0.258 | 1.000  |
|        | p value       | 0.184  | 0.020  | 0.184  | 0.000  |
| 4-HBP  | Pearson Corr. |        | -0.258 | 1.000  | -0.258 |
|        | p value       |        | 0.184  | 0.038  | 0.184  |
| BP1    | Pearson Corr. |        |        | -0.258 | 0.800  |
|        | p value       |        |        | 0.184  | 0.020  |
| BP-8   | Pearson Corr. |        |        |        | -0.258 |
|        | p value       |        |        |        | 0.184  |

**Table S15.** Pearson correlation and p-values determined between BP-3 and metabolites in intestine

| Intestine |               | BP-1  | BP-8   | BP-3   | BP-10  |
|-----------|---------------|-------|--------|--------|--------|
| 234HBP    | Pearson Corr. | 1.000 | -0.738 | 1.000  | 0.823  |
|           | p value       | 0.000 | 0.262  | 0.000  | 0.017  |
| BP-1      | Pearson Corr. |       | -0.738 | 1.000  | 0.844  |
|           | p value       |       | 0.262  | 0.000  | 0.025  |
| BP-8      | Pearson Corr. |       |        | -0.738 | -0.211 |
|           | p value       |       |        | 0.262  | -0.714 |
| BP-3      | Pearson Corr. |       |        |        | 0.873  |
|           | p value       |       |        |        | 0.012  |



**Table S16.** Pearson correlation and p-values determined between BP-3 and metabolites in the intestinal content

| Intestinal content |               | 4HBP  | BP-1  | BP-8   | BP-3   | BP-10  |
|--------------------|---------------|-------|-------|--------|--------|--------|
| 234HBP             | Pearson Corr. | 0.200 | 1.000 | -0.775 | 1.000  | 1.000  |
|                    | p value       | 0.800 | 0.000 | 0.225  | 0.000  | 0.000  |
| 4HBP               | Pearson Corr. |       | 0.200 | -0.775 | 0.200  | 0.200  |
|                    | p value       |       | 0.800 | 0.225  | 0.800  | 0.800  |
| BP-1               | Pearson Corr. |       |       | -0.775 | 1.000  | 1.000  |
|                    | p value       |       |       | 0.225  | 0.000  | 0.000  |
| BP-8               | Pearson Corr. |       |       |        | -0.844 | -0.775 |
|                    | p value       |       |       |        | 0.025  | 0.225  |
| BP-3               | Pearson Corr. |       |       |        |        | 1.000  |
|                    | p value       |       |       |        |        | 0.000  |

**Table S17.** Pearson correlation and p-values determined between BP-3 and metabolites in skin

| Skin   |               | BP-1  | BP-8   | BP-3   |
|--------|---------------|-------|--------|--------|
| 234HBP | Pearson Corr. | 0.800 | 0.000  | 1.000  |
|        | p value       | 0.020 | 1.000  | 0.000  |
| BP-1   | Pearson Corr. |       | -0.775 | 0.800  |
|        | p value       |       | 0.225  | 0.013  |
| BP-8   | Pearson Corr. |       |        | -0.258 |
|        | p value       |       |        | 0.742  |

**Table S18.** Pearson correlation and p-values determined between BP-3 and metabolites in scaly

| Scaly  |               | BP-3  |
|--------|---------------|-------|
| 234HBP | Pearson Corr. | 1.000 |
|        | p value       | 0.000 |
